# Supplementary material for: Trafficking dynamics of VEGFR1, VEGFR2, and NRP1 in human endothelial cells
Source: PLOS journal article supplement (doi:10.1371/journal.pcbi.1011798), 2024-02-07
Supplement: S2 (10.1371/journal.pcbi.1011798.s002) [file journal.pcbi.1011798.s002]

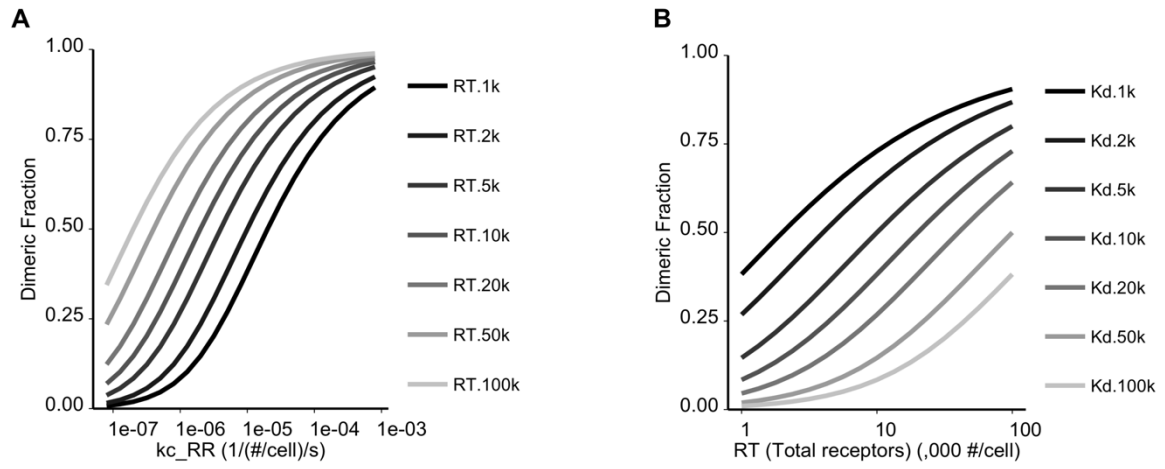

**S1 Fig. Theoretical estimate of VEGFR dimerization**, depending on coupling rate constant ( $k_c$ ) **(A)** and total receptor density ( $R_T$  in #/cell) **(B)**. Here the uncoupling rate constant,  $k_d = 0.01 \text{ s}^{-1}$ , and thus for  $k_c = 10^{-5} (\text{\#}/\text{cell})^{-1}\text{s}^{-1}$ , equilibrium constant ( $K_d = k_d/k_c$ ) is 1000 #/cell and for  $k_c = 10^{-7} (\text{\#}/\text{cell})^{-1}\text{s}^{-1}$ ,  $K_d = 10^5 \text{ #}/\text{cell}$ .
