# Supplementary material for: Trafficking dynamics of VEGFR1, VEGFR2, and NRP1 in human endothelial cells
Source: PLOS journal article supplement (doi:10.1371/journal.pcbi.1011798), 2024-02-07
Supplement: S13 (10.1371/journal.pcbi.1011798.s013) [file journal.pcbi.1011798.s013]

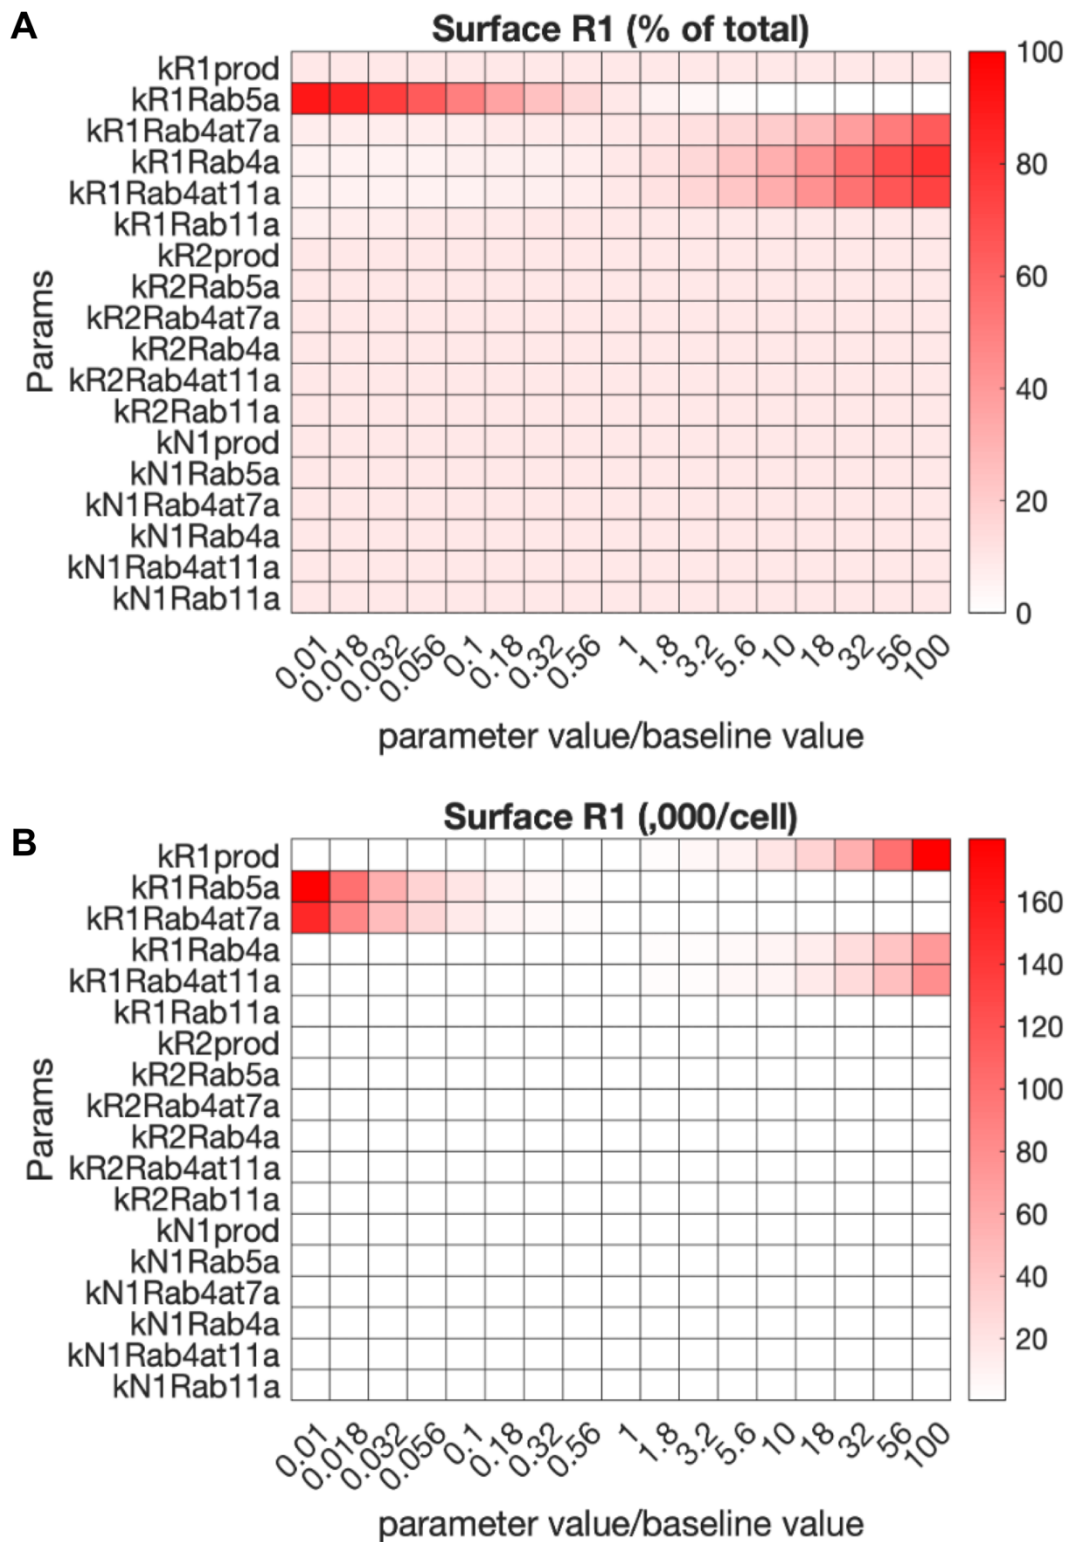

**S12 Fig. Global sensitivity analysis – VEGFR1 on the surface.** This panel shows how changing the various trafficking and production parameters impacts the simulation predictions to be compared two key experimental data points: the absolute number of surface VEGFR1 (**B**) and the percentage of cell VEGFR1 that is on the surface (**A**).
